# Supplementary material for: Enhancing Adult Learning through Problem-Based Learning and Knowledge Scaffolding: A Case from Postgraduate Immunology Education
Source: Research Square preprint supplement (doi:10.21203/rs.3.rs-8477616/v1), 2026-01-19
Supplement: Supplementary file 1 [file bb890d01ad532845007af2fe.docx]

# Supplementary File 1

Student Feedback Questionnaire on Problem-Based Learning (PBL) and Knowledge Scaffolding

**Title:**Postgraduate Student Feedback on Problem-Based Learning and Knowledge Scaffolding

**Instructions:**Please indicate your level of agreement with each statement based on your experience in today’s learning session. Your responses are anonymous.

Response Scale:
1 = Strongly Disagree
2 = Disagree
3 = Agree
4 = Strongly Agree

| No | Statement | 1 | 2 | 3 | 4 |
| --- | --- | --- | --- | --- | --- |
| 1 | The small-group mind-mapping activity encouraged me to share my ideas. | ☐ | ☐ | ☐ | ☐ |
| 2 | The class-wide mind-map increased my confidence in expressing my views. | ☐ | ☐ | ☐ | ☐ |
| 3 | This activity helped me to solve problems creatively, even without prior knowledge. | ☐ | ☐ | ☐ | ☐ |
| 4 | I gained confidence in facing new learning challenges through this activity. | ☐ | ☐ | ☐ | ☐ |
| 5 | The teacher provided clear and adequate guidance throughout the activity. | ☐ | ☐ | ☐ | ☐ |
| 6 | This exercise helped improve my performance in the in-class assessment. | ☐ | ☐ | ☐ | ☐ |
| 7 | The skills I gained are useful for my guided independent study (GIS). | ☐ | ☐ | ☐ | ☐ |
| 8 | I would recommend that this activity be continued in future sessions. | ☐ | ☐ | ☐ | ☐ |
